# Supplementary material
Source: publisher figshare collection journal article supplement (https://sage.figshare.com/ndownloader/files/17890193)
Supplement: Supplementary file 1 [file 17890193]

## Supplementary material

Table 1

*Characteristics of the offender and test statistics of difference between offender-rated Trust pattern subgroups*

| Offender-related predictor                            | deteriorating |       | stable |       | improving |       | F( $\chi^2$ ) | Sign        |
|-------------------------------------------------------|---------------|-------|--------|-------|-----------|-------|---------------|-------------|
|                                                       | M(%)          | SD    | M(%)   | SD    | M(%)      | SD    |               |             |
| Age                                                   | 34.26         | 13.56 | 35.32  | 12.88 | 36.35     | 11.25 | 0.15          | 0.87        |
| Previous supervision, no                              | 66.7%         |       | 75.2%  |       | 58.8%     |       | 2.62          | 0.27        |
| Addiction                                             | 2.76          | 1.73  | 2.69   | 2.05  | 3.27      | 2.28  | 0.55          | 0.58        |
| I think this client is mentally impaired              | 4.57          | 1.33  | 4.42   | 1.90  | 3.40      | 1.68  | 2.28          | <b>0.11</b> |
| I think this clients conscious development was normal | 11.00         | 5.58  | 8.24   | 5.26  | 8.38      | 3.99  | 2.21          | <b>0.11</b> |
| Gender male                                           | 88.9%         |       | 87.3%  |       | 88.2%     |       | 0.06          | 0.97        |
| Living situation                                      | 5.41          | 2.96  | 4.80   | 3.00  | 5.71      | 2.89  | 1.05          | 0.35        |
| - partner                                             | 11.1%         |       | 10.2%  |       | 0.0%      |       | 21.50         | <b>0.01</b> |
| - partner and children                                | 3.7%          |       | 21.0%  |       | 5.9%      |       |               |             |
| - single parent                                       | 3.7%          |       | 3.2%   |       | 23.5%     |       |               |             |
| - single                                              | 44.4%         |       | 34.4%  |       | 29.4%     |       |               |             |
| - other                                               | 37.0%         |       | 31.2%  |       | 41.2%     |       |               |             |
| Active employment                                     |               |       |        |       |           |       | 3.03          | 0.55        |
| - no job                                              | 63.0%         |       | 52.9%  |       | 70.6%     |       |               |             |
| - paid job                                            | 33.3%         |       | 42.0%  |       | 29.4%     |       |               |             |
| - volunteer work                                      | 3.7%          |       | 5.1%   |       | 0.0%      |       |               |             |
| Age at first conviction                               | 20.06         | 6.42  | 22.47  | 10.62 | 20.23     | 6.65  | 0.67          | 0.51        |
| RISc- Delict History + Current offense                | 4.82          | 2.91  | 5.21   | 3.74  | 8.36      | 3.18  | 5.18          | <b>0.01</b> |
| RISc- Accomodation                                    | 1.36          | 2.24  | 1.22   | 1.71  | 1.93      | 2.09  | 0.96          | 0.39        |
| RISc- Education and employment                        | 5.77          | 4.17  | 4.29   | 3.38  | 4.86      | 2.85  | 1.80          | <b>0.17</b> |
| RISc- Income and financial management                 | 2.32          | 2.12  | 2.32   | 2.10  | 2.71      | 1.49  | 0.24          | 0.79        |
| RISc- Relationship partner, relatives, family         | 3.05          | 2.40  | 3.29   | 2.31  | 5.21      | 2.99  | 4.42          | <b>0.01</b> |
| RISc- Relationships friends                           | 2.23          | 1.80  | 1.72   | 1.89  | 2.29      | 2.13  | 1.09          | 0.34        |
| RISc- Drug abuse                                      | 2.09          | 2.88  | 2.60   | 3.38  | 2.29      | 2.30  | 0.27          | 0.77        |
| RISc- Alcohol abuse                                   | 1.64          | 2.17  | 2.06   | 2.91  | 2.14      | 2.45  | 0.23          | 0.80        |
| RISc- Emotional well-being                            | 2.86          | 2.78  | 3.44   | 2.42  | 4.07      | 2.79  | 1.03          | 0.36        |
| RISc- Thinking and behavior                           | 5.95          | 3.64  | 6.32   | 3.29  | 9.50      | 1.95  | 6.45          | <b>0.00</b> |
| RISc- Attitudes                                       | 1.95          | 1.76  | 2.58   | 2.32  | 4.79      | 2.08  | 7.48          | <b>0.00</b> |
| Internal motivation                                   | 4.33          | 2.30  | 5.41   | 2.01  | 3.65      | 2.15  | 7.90          | <b>0.00</b> |
| Internal regulation                                   | 4.64          | 1.75  | 5.11   | 1.71  | 3.57      | 2.07  | 6.35          | <b>0.00</b> |
| External regulation                                   | 5.64          | 1.37  | 5.71   | 1.46  | 5.90      | 1.31  | 0.17          | 0.84        |
| Amotivation                                           | 3.04          | 1.68  | 2.87   | 1.55  | 4.15      | 1.94  | 4.86          | <b>0.01</b> |
| I think I easily get involved again in an offense     | 2.22          | 1.91  | 1.71   | 1.50  | 2.06      | 1.64  | 1.48          | 0.23        |

|                                                         |      |      |      |      |      |      |      |             |
|---------------------------------------------------------|------|------|------|------|------|------|------|-------------|
| I wonder if this supervision was necessary to me.       | 4.96 | 2.38 | 4.39 | 2.40 | 5.76 | 1.99 | 2.99 | <b>0.05</b> |
| I think I was unlucky that I got involved in this crime | 4.56 | 2.56 | 4.45 | 2.49 | 4.65 | 2.76 | 0.06 | 0.94        |
| I only need some practical support from the probation   | 3.48 | 2.24 | 4.00 | 2.42 | 4.29 | 2.42 | 0.69 | 0.50        |
| I can change my behavior as well without probation      | 4.62 | 2.28 | 4.74 | 2.37 | 5.94 | 1.95 | 2.02 | <b>0.14</b> |
| I know exactly where there are the risks to me.         | 6.63 | 0.79 | 6.39 | 1.19 | 6.65 | 0.61 | 0.85 | 0.43        |
| It would be surprised when I finish this supervision    | 1.78 | 1.85 | 1.42 | 1.25 | 2.53 | 2.48 | 4.63 | <b>0.01</b> |
| I think I'm definitely able to change my behavior       | 6.58 | 1.24 | 6.43 | 1.32 | 6.41 | 1.18 | 0.14 | 0.87        |

---

*Note. Bold values are statistically significant at  $p < 0.20$*

Table 2

*Characteristics of the PO and test statistics of difference between offender-rated Trust pattern subgroups*

| PO-related predictor                                                                    | deteriorating |      | stable |      | improving |      | F( $\chi^2$ ) | Sig.        |
|-----------------------------------------------------------------------------------------|---------------|------|--------|------|-----------|------|---------------|-------------|
|                                                                                         | M(%)          | SD   | M(%)   | SD   | M(%)      | SD   |               |             |
| Gender, male                                                                            | 17.4%         |      | 35.9%  |      | 46.7%     |      | 4.09          | <b>0.13</b> |
| Age                                                                                     | 2.04          | 1.26 | 2.43   | 1.17 | 2.00      | 0.85 | 1.82          | <b>0.17</b> |
| Work experience probation                                                               | 6.95          | 7.01 | 6.84   | 7.35 | 4.17      | 2.83 | 1.00          | 0.37        |
| General work experience                                                                 | 14.26         | 11.2 | 16.88  | 11.3 | 10.77     | 6.70 | 2.43          | <b>0.09</b> |
| Change of PO                                                                            | 0.67          | 1.24 | 0.22   | 0.60 | 0.06      | 0.24 | 5.40          | <b>0.01</b> |
| Until now, I have been too compliant with this client                                   | 3.61          | 1.78 | 3.52   | 1.95 | 3.60      | 1.59 | 1.19          | 0.31        |
| This client shows inappropriate behavior                                                | 1.65          | 1.23 | 1.39   | 1.05 | 1.53      | 0.83 | 0.03          | 0.97        |
| This client says he / she cooperates, but I do not notice it                            | 2.38          | 1.40 | 1.92   | 1.23 | 2.80      | 1.21 | 0.69          | 0.50        |
| I am afraid of this client                                                              | 1.10          | 0.30 | 1.11   | 0.40 | 1.33      | 0.82 | 1.83          | <b>0.16</b> |
| Working with this client gives me energy                                                | 4.73          | 1.52 | 4.94   | 1.42 | 5.00      | 1.00 | 0.24          | 0.78        |
| I feel I can mean something for this client                                             | 5.17          | 1.15 | 5.25   | 1.28 | 5.07      | 0.88 | 0.17          | 0.85        |
| I am more strict with this client than I usually am                                     | 2.61          | 1.31 | 2.10   | 1.43 | 1.93      | 1.10 | 1.53          | 0.22        |
| If this client does not show up, I feel a bit relieved                                  | 1.57          | 1.21 | 1.14   | 0.35 | 1.47      | 0.92 | 6.31          | <b>0.00</b> |
| If I had the choice, I would hand this client over to a colleague                       | 1.52          | 1.04 | 1.22   | 0.52 | 1.40      | 0.63 | 2.83          | <b>0.06</b> |
| I wonder if this client can keep up with the supervision conditions                     | 3.39          | 1.67 | 2.69   | 1.73 | 3.93      | 1.33 | 4.57          | <b>0.01</b> |
| This client just had bad luck getting involved in this offense                          | 2.24          | 1.64 | 1.94   | 1.31 | 1.67      | 0.72 | 0.85          | 0.43        |
| This client only needs some practical support from the probation                        | 3.04          | 1.69 | 3.06   | 1.81 | 2.87      | 1.55 | 0.08          | 0.92        |
| This client is definitely capable of changing his/her behavior                          | 5.09          | 1.02 | 5.21   | 1.38 | 4.67      | 1.11 | 1.17          | 0.31        |
| This client wonders if he/she is capable of changing his/her behavior                   | 3.59          | 1.40 | 3.53   | 1.56 | 4.07      | 1.16 | 0.86          | 0.42        |
| I think this client will easily get involved in a crime again                           | 4.36          | 1.18 | 3.50   | 1.70 | 4.80      | 1.78 | 6.13          | <b>0.00</b> |
| To be honest, I would be surprised if this client successfully finishes the supervision | 2.82          | 1.33 | 1.85   | 1.16 | 3.00      | 2.00 | 10.1          | <b>0.00</b> |
| With this client, supervision would not have been necessary                             | 2.00          | 1.31 | 2.48   | 1.62 | 1.80      | 1.08 | 2.00          | <b>0.14</b> |

|                                                                                                                    |      |      |      |      |      |      |      |             |
|--------------------------------------------------------------------------------------------------------------------|------|------|------|------|------|------|------|-------------|
| My client believes he / she does not need the probation to change his / her behavior                               | 4.48 | 1.34 | 4.31 | 1.79 | 4.00 | 1.20 | 0.36 | 0.70        |
| My client knows exactly what his / her risks are                                                                   | 4.13 | 1.42 | 4.58 | 1.49 | 4.07 | 1.39 | 1.56 | 0.21        |
| I know exactly which behavior of my client increases the risk                                                      | 5.05 | 1.43 | 5.10 | 1.38 | 5.00 | 1.20 | 0.05 | 0.96        |
| I think this client is highly motivated to cooperate with the supervision                                          | 4.77 | 1.41 | 5.22 | 1.46 | 4.00 | 1.41 | 5.27 | <b>0.01</b> |
| This client only cooperates because the supervision was imposed by court                                           | 4.57 | 1.93 | 3.85 | 1.89 | 5.21 | 1.42 | 4.40 | <b>0.01</b> |
| I think this client can be motivated to successfully finish the supervision                                        | 5.70 | 1.02 | 6.13 | 1.01 | 5.27 | 1.44 | 5.80 | <b>0.00</b> |
| I think this client will already recidivate during supervision                                                     | 3.64 | 1.18 | 2.80 | 1.54 | 4.00 | 1.51 | 6.65 | <b>0.00</b> |
| I estimate that during a supervision interview with this client I spend ... % of the time on monitoring activities | 2.04 | 0.93 | 1.99 | 0.91 | 2.40 | 0.91 | 1.40 | 0.25        |
| I find this client more difficult than most of my other clients                                                    | 2.48 | 1.47 | 1.91 | 1.33 | 2.33 | 1.11 | 2.27 | <b>0.11</b> |
| I feel more than competent to carry out the supervision of him/her properly.                                       | 6.26 | 0.81 | 6.17 | 1.13 | 6.00 | 0.65 | 0.28 | 0.76        |
| During my career as a probation officer, I have had to deal with violence by a client                              | 3.00 | 2.09 | 3.46 | 2.24 | 3.20 | 2.40 | 0.47 | 0.63        |
| During my career as probation officer, I have had to deal with inappropriate behavior of a client                  | 5.59 | 1.87 | 4.89 | 2.20 | 4.53 | 2.23 | 1.30 | 0.28        |
| I love to go to my work                                                                                            | 6.48 | 0.79 | 6.28 | 0.92 | 5.80 | 1.61 | 2.26 | <b>0.11</b> |
| I believe that as a probation officer, I can mean a lot to my clients                                              | 6.04 | 0.88 | 5.86 | 0.93 | 5.47 | 0.74 | 1.85 | <b>0.16</b> |
| I feel safe with my colleagues from my unit                                                                        | 6.30 | 1.15 | 6.25 | 1.16 | 6.13 | 0.74 | 0.11 | 0.90        |
| I feel I get enough support from the organisation in case of a problem                                             | 6.30 | 0.97 | 5.99 | 1.20 | 5.60 | 0.74 | 1.74 | <b>0.18</b> |
| In my private life, I am proud to tell I work as a probation officer                                               | 5.96 | 1.49 | 5.63 | 1.49 | 5.73 | 1.49 | 0.47 | 0.62        |
| I do not like my work so much                                                                                      | 1.87 | 1.32 | 1.94 | 1.25 | 1.80 | 0.94 | 0.12 | 0.89        |
| As a probation officer, I feel respected by colleagues from other organisations                                    | 6.22 | 0.80 | 6.05 | 0.92 | 5.93 | 0.88 | 0.51 | 0.60        |

|                                                                                           |      |      |      |      |      |      |      |             |
|-------------------------------------------------------------------------------------------|------|------|------|------|------|------|------|-------------|
| As a probation officer, I can influence other organisations (e.g., housing, debts, care)  | 5.04 | 1.19 | 4.77 | 1.55 | 4.93 | 1.44 | 0.37 | 0.69        |
| I feel the responsibility of being a probation officer as heavy                           | 4.61 | 1.78 | 4.24 | 1.81 | 4.40 | 1.64 | 0.44 | 0.65        |
| I often think about the possibility of an incident with one of my clients                 | 3.26 | 2.00 | 3.10 | 1.71 | 3.53 | 1.77 | 0.47 | 0.63        |
| I am often awake at night because I worry that one of my clients will recidivate          | 2.22 | 1.62 | 1.99 | 1.29 | 2.20 | 1.42 | 0.39 | 0.68        |
| I would like to know more about methodologies of risk management                          | 5.30 | 1.49 | 4.89 | 1.72 | 5.00 | 0.93 | 0.65 | 0.52        |
| I am part of a good functioning intervision group                                         | 4.14 | 2.22 | 4.23 | 2.34 | 4.21 | 2.19 | 0.01 | 0.99        |
| I think it is very good that the probation works with evidence based interventions        | 6.35 | 0.98 | 6.19 | 1.10 | 6.20 | 0.86 | 0.23 | 0.80        |
| I feel sorry for victims of crime                                                         | 5.57 | 1.70 | 5.52 | 1.56 | 5.47 | 1.06 | 0.02 | 0.98        |
| I want to contribute to an adequate execution of sanctions                                | 6.00 | 1.15 | 5.54 | 1.50 | 5.20 | 1.42 | 1.48 | 0.23        |
| I feel sorry for people who do not see a way back to society after a crime                | 6.23 | 0.92 | 5.94 | 1.18 | 5.73 | 0.88 | 0.95 | 0.39        |
| I prefer to work with mandated clients instead of in a voluntary context                  | 5.73 | 1.52 | 5.20 | 1.63 | 4.53 | 1.68 | 2.43 | <b>0.09</b> |
| I believe that people deserve an honest new chance in society after committing an offense | 6.30 | 0.97 | 6.26 | 0.88 | 6.20 | 0.68 | 0.07 | 0.94        |
| I want to contribute to a decrease of crime and nuisance in society                       | 6.35 | 0.65 | 6.28 | 0.87 | 6.20 | 0.56 | 0.15 | 0.86        |
| I am interested in human behavior                                                         | 6.78 | 0.52 | 6.62 | 0.67 | 6.53 | 0.52 | 0.85 | 0.43        |
| I like being a part of the judicial system                                                | 6.13 | 1.01 | 5.75 | 1.37 | 5.87 | 0.83 | 0.88 | 0.42        |
| I think it is a challenge to work with people on a better future                          | 6.61 | 0.58 | 6.45 | 0.78 | 6.33 | 0.49 | 0.71 | 0.49        |
| I like to work with people with complex problems                                          | 6.00 | 1.45 | 6.00 | 1.21 | 6.07 | 0.80 | 0.02 | 0.98        |
| Every person counts                                                                       | 6.57 | 0.73 | 6.42 | 0.92 | 6.33 | 0.62 | 0.38 | 0.69        |
| I need to make money with something                                                       | 3.00 | 1.88 | 3.19 | 1.98 | 2.93 | 1.94 | 0.18 | 0.84        |

*Note. Bold values are statistically significant at  $p < 0.20$*

Table 3

*Characteristics of the offender and test statistics of difference between offender-rated Bond pattern subgroups*

| Offender-related predictor                            | deteriorating |       | stable |       | improving |       | F( $\chi^2$ ) | sign        |
|-------------------------------------------------------|---------------|-------|--------|-------|-----------|-------|---------------|-------------|
|                                                       | M(%)          | SD    | M(%)   | SD    | M(%)      | SD    |               |             |
| Age                                                   | 33.56         | 15.51 | 34.97  | 12.61 | 40.06     | 11.50 | 1.32          | 0.27        |
| Previous supervision, yes                             | 62.5%         |       | 72.2%  |       | 87.5%     |       | 2.62          | 0.27        |
| Addiction                                             | 9.80          | 5.53  | 8.66   | 5.36  | 6.85      | 3.48  | 1.00          | 0.37        |
| I think this client is mentally impaired              | 3.31          | 2.25  | 2.65   | 1.97  | 3.21      | 2.46  | 1.03          | 0.36        |
| I think this clients conscious development was normal | 4.07          | 1.90  | 4.37   | 1.84  | 4.43      | 1.91  | 0.18          | 0.84        |
| Gender, male                                          | 93.8%         |       | 87.0%  |       | 87.5%     |       | 0.62          | 0.74        |
| Living situation                                      |               |       |        |       |           |       | 3.91          | 0.87        |
| - partner                                             | 6.3%          |       | 10.1%  |       | 6.3%      |       |               |             |
| - partner and children                                | 6.3%          |       | 18.9%  |       | 12.5%     |       |               |             |
| - single parent                                       | 6.3%          |       | 5.3%   |       | 0.0%      |       |               |             |
| - single                                              | 43.8%         |       | 33.7%  |       | 43.8%     |       |               |             |
| - other                                               | 37.5%         |       | 32.0%  |       | 37.5%     |       |               |             |
| Active employment                                     |               |       |        |       |           |       | 7.00          | <b>0.14</b> |
| - no job                                              | 75.0%         |       | 55.6%  |       | 37.5%     |       |               |             |
| - paid job                                            | 18.8%         |       | 40.8%  |       | 50.0%     |       |               |             |
| - volunteer work                                      | 6.3%          |       | 3.6%   |       | 12.5%     |       |               |             |
| Age at first conviction                               | 19.36         | 5.05  | 21.71  | 10.00 | 26.73     | 10.92 | 1.73          | <b>0.18</b> |
| RISc- Delict History + Current offense                | 6.31          | 3.12  | 5.46   | 3.77  | 4.36      | 3.34  | 0.96          | 0.38        |
| RISc- Accomodation                                    | 1.54          | 1.85  | 1.28   | 1.82  | 1.29      | 1.90  | 0.12          | 0.89        |
| RISc- Education and employment                        | 5.69          | 4.53  | 4.55   | 3.38  | 3.36      | 3.13  | 1.54          | 0.22        |
| RISc- Income and financial management                 | 2.62          | 2.47  | 2.35   | 2.07  | 2.14      | 1.46  | 0.18          | 0.84        |
| RISc- Relationship partner, relatives, family         | 3.62          | 3.18  | 3.39   | 2.38  | 3.57      | 2.28  | 0.08          | 0.93        |
| RISc- Relationships friends                           | 1.77          | 1.88  | 1.92   | 1.92  | 1.14      | 1.61  | 1.07          | 0.35        |
| RISc- Drug abuse                                      | 2.69          | 3.07  | 2.64   | 3.34  | 1.00      | 1.75  | 1.68          | <b>0.19</b> |
| RISc- Alcohol abuse                                   | 1.85          | 3.29  | 1.96   | 2.72  | 2.64      | 2.95  | 0.41          | 0.66        |
| RISc- Emotional well-being                            | 2.62          | 2.36  | 3.46   | 2.51  | 3.79      | 2.58  | 0.84          | 0.43        |
| RISc- Thinking and behavior                           | 6.15          | 4.02  | 6.59   | 3.22  | 6.50      | 4.22  | 0.10          | 0.91        |
| RISc- Attitudes                                       | 2.38          | 2.63  | 2.65   | 2.20  | 3.29      | 3.20  | 0.59          | 0.56        |
| internal motivation                                   | 5.25          | 1.95  | 5.26   | 2.07  | 3.50      | 2.37  | 5.23          | 0.01        |
| Internal regulation                                   | 4.98          | 1.57  | 5.09   | 1.72  | 3.02      | 1.72  | 10.77         | <b>0.00</b> |
| External regulation                                   | 6.27          | 1.17  | 5.63   | 1.45  | 6.09      | 1.30  | 2.06          | <b>0.13</b> |
| Amotivation                                           | 3.09          | 1.41  | 2.89   | 1.62  | 4.13      | 1.65  | 4.37          | <b>0.01</b> |

|                                                         |      |      |      |      |      |      |      |             |
|---------------------------------------------------------|------|------|------|------|------|------|------|-------------|
| I think I easily get involved again in an offense       | 1.75 | 1.39 | 1.83 | 1.63 | 1.56 | 1.26 | 0.22 | 0.80        |
| I wonder if this supervision was necessary to me.       | 4.81 | 2.40 | 4.50 | 2.39 | 5.25 | 2.41 | 0.80 | 0.45        |
| I think I was unlucky that I got involved in this crime | 5.31 | 2.63 | 4.32 | 2.50 | 5.31 | 2.30 | 2.13 | <b>0.12</b> |
| I only need some practical support from the probation   | 5.07 | 2.34 | 3.82 | 2.40 | 4.46 | 2.03 | 2.21 | <b>0.11</b> |
| I can change my behavior as well without probation      | 4.69 | 2.36 | 4.77 | 2.36 | 5.64 | 2.13 | 0.93 | 0.40        |
| I know exactly where there are the risks to me.         | 6.38 | 1.02 | 6.42 | 1.15 | 6.81 | 0.54 | 0.97 | 0.38        |
| It would be surprised when I finish this supervision    | 1.75 | 1.88 | 1.54 | 1.46 | 1.63 | 1.63 | 0.15 | 0.86        |
| I think I'm definitely able to change my behavior       | 6.40 | 1.45 | 6.54 | 1.13 | 5.43 | 2.28 | 4.99 | <b>0.01</b> |

---

*Note. Bold values are statistically significant at  $p < 0.20$*

Table 4

*Characteristics of the PO and test statistics of difference between offender-rated Bond pattern subgroups*

| PO-related predictors                                                                   | deteriorating |      | stable |       | improving |      | F( $\chi^2$ ) | Sig.        |
|-----------------------------------------------------------------------------------------|---------------|------|--------|-------|-----------|------|---------------|-------------|
|                                                                                         | M(%)          | SD   | M(%)   | SD    | M(%)      | SD   |               |             |
| Gender, male                                                                            | 28.6%         |      | 33.5%  |       | 50.0%     |      | 1.77          | 0.41        |
| Age                                                                                     | 2.71          | 1.14 | 2.28   | 1.16  | 2.71      | 1.14 | 1.69          | <b>0.19</b> |
| Work experience probation                                                               | 7.86          | 6.32 | 6.56   | 7.18  | 6.18      | 6.73 | 0.25          | 0.78        |
| General work experience                                                                 | 15.35         | 9.79 | 15.76  | 11.37 | 19.54     | 9.00 | 0.77          | 0.47        |
| Change of PO                                                                            | 0.31          | 0.87 | 0.27   | 0.70  | 0.25      | 0.77 | 0.03          | 0.97        |
| Until now, I have been too compliant with this client                                   | 4.21          | 1.76 | 3.48   | 1.90  | 3.46      | 1.90 | 0.97          | 0.38        |
| This client shows inappropriate behavior                                                | 1.43          | 1.09 | 1.43   | 1.08  | 1.43      | 0.85 | 0.00          | 1.00        |
| This client says he / she cooperates, but I do not notice it                            | 1.71          | 0.73 | 2.02   | 1.26  | 2.64      | 1.65 | 2.08          | <b>0.13</b> |
| I am afraid of this client                                                              | 1.21          | 0.80 | 1.13   | 0.41  | 1.00      | 0.00 | 0.88          | 0.42        |
| Working with this client gives me energy                                                | 5.29          | 1.90 | 4.94   | 1.30  | 4.23      | 1.69 | 2.11          | <b>0.12</b> |
| I feel I can mean something for this client                                             | 5.14          | 1.96 | 5.25   | 1.16  | 5.00      | 1.24 | 0.30          | 0.74        |
| I am more strict with this client than I usually am                                     | 2.64          | 1.74 | 2.13   | 1.38  | 1.86      | 1.17 | 1.20          | 0.30        |
| If this client does not show up, I feel a bit relieved                                  | 1.29          | 0.83 | 1.21   | 0.55  | 1.31      | 0.85 | 0.23          | 0.79        |
| If I had the choice, I would hand this client over to a colleague                       | 1.14          | 0.36 | 1.26   | 0.60  | 1.50      | 0.94 | 1.28          | 0.28        |
| I wonder if this client can keep up with the supervision conditions                     | 3.43          | 1.60 | 2.81   | 1.73  | 3.07      | 1.82 | 0.91          | 0.40        |
|                                                                                         |               |      |        |       |           |      |               |             |
| This client just had bad luck getting involved in this offense                          | 2.36          | 1.34 | 1.97   | 1.35  | 1.38      | 0.51 | 1.90          | <b>0.15</b> |
| This client only needs some practical support from the probation                        | 3.14          | 1.75 | 3.13   | 1.79  | 2.00      | 1.18 | 2.70          | <b>0.07</b> |
| This client is definitely capable of changing his / her behavior                        | 4.50          | 1.65 | 5.26   | 1.26  | 4.57      | 1.45 | 3.67          | <b>0.03</b> |
| This client wonders if he / she is capable of changing his / her behavior               | 3.50          | 1.34 | 3.56   | 1.53  | 3.93      | 1.44 | 0.41          | 0.67        |
| I think this client will easily get involved in a crime again                           | 4.00          | 2.18 | 3.67   | 1.67  | 3.93      | 1.64 | 0.37          | 0.69        |
| To be honest, I would be surprised if this client successfully finishes the supervision | 2.21          | 1.63 | 2.01   | 1.31  | 2.50      | 1.22 | 0.99          | 0.37        |



|                                                                                                                    |      |      |      |      |      |      |      |             |
|--------------------------------------------------------------------------------------------------------------------|------|------|------|------|------|------|------|-------------|
| With this client, supervision would not have been necessary                                                        | 2.36 | 1.50 | 2.35 | 1.53 | 2.50 | 1.95 | 0.06 | 0.95        |
| My client believes he / she does not need the probation to change his / her behavior                               | 4.21 | 1.76 | 4.31 | 1.70 | 4.36 | 1.65 | 0.03 | 0.97        |
| My client knows exactly what his / her risks are                                                                   | 4.50 | 1.61 | 4.54 | 1.46 | 3.79 | 1.48 | 1.69 | <b>0.19</b> |
| I know exactly which behavior of my client increases the risk                                                      | 5.21 | 1.58 | 5.09 | 1.32 | 4.86 | 1.66 | 0.26 | 0.77        |
| I think this client is highly motivated to cooperate with the supervision                                          | 5.38 | 0.96 | 5.15 | 1.43 | 3.79 | 1.93 | 6.08 | <b>0.00</b> |
| This client only cooperates because the supervision was imposed by court                                           | 4.33 | 1.92 | 3.95 | 1.89 | 4.86 | 1.92 | 1.60 | 0.21        |
| I think this client can be motivated to successfully finish the supervision                                        | 6.00 | 1.11 | 6.08 | 1.01 | 5.21 | 1.48 | 4.30 | <b>0.02</b> |
| I think this client will already recidivate during supervision                                                     | 3.50 | 1.99 | 2.92 | 1.50 | 3.36 | 1.45 | 1.31 | 0.27        |
| I estimate that during a supervision interview with this client I spend ... % of the time on monitoring activities | 2.36 | 1.22 | 2.00 | 0.89 | 2.00 | 0.88 | 0.98 | 0.38        |
| I find this client more difficult than most of my other clients                                                    | 2.14 | 1.29 | 1.95 | 1.31 | 2.64 | 1.65 | 1.81 | <b>0.17</b> |
| I feel more than competent to carry out the supervision of him/her properly.                                       | 5.79 | 2.08 | 6.19 | 0.95 | 6.29 | 0.73 | 1.05 | 0.35        |
| During my career as a probation officer, I have had to deal with violence by a client                              | 4.21 | 2.12 | 3.35 | 2.23 | 2.79 | 2.15 | 1.50 | 0.23        |
| During my career as probation officer, I have had to deal with inappropriate behavior of a client                  | 5.21 | 2.36 | 4.91 | 2.13 | 5.07 | 2.50 | 0.15 | 0.86        |
| I love to go to my work                                                                                            | 6.57 | 0.65 | 6.26 | 1.01 | 6.00 | 1.00 | 1.16 | 0.32        |
| I believe that as a probation officer, I can mean a lot to my clients                                              | 6.14 | 0.77 | 5.82 | 0.94 | 5.93 | 0.83 | 0.85 | 0.43        |
| I feel safe with my colleagues from my unit                                                                        | 6.43 | 1.09 | 6.21 | 1.16 | 6.50 | 0.65 | 0.63 | 0.53        |
| I feel I get enough support from the organisation in case of a problem                                             | 6.50 | 0.65 | 5.94 | 1.17 | 6.07 | 1.21 | 1.56 | 0.21        |
| In my private life, I am proud to tell I work as a probation officer                                               | 6.07 | 0.83 | 5.73 | 1.41 | 4.79 | 2.33 | 3.19 | <b>0.04</b> |
| I do not like my work so much                                                                                      | 1.71 | 0.99 | 1.97 | 1.27 | 1.64 | 1.08 | 0.66 | 0.52        |
| As a probation officer, I feel respected by colleagues from other organisations                                    | 6.36 | 0.63 | 6.05 | 0.88 | 5.86 | 1.29 | 1.13 | 0.33        |

|                                                                                           |      |      |      |      |      |      |      |             |
|-------------------------------------------------------------------------------------------|------|------|------|------|------|------|------|-------------|
| As a probation officer, I can influence other organisations (e.g., housing, debts, care)  | 5.29 | 1.38 | 4.77 | 1.55 | 4.93 | 0.92 | 0.81 | 0.45        |
| I feel the responsibility of being a probation officer as heavy                           | 5.00 | 1.36 | 4.23 | 1.75 | 4.36 | 2.47 | 1.19 | 0.31        |
| I often think about the possibility of an incident with one of my clients                 | 3.00 | 1.71 | 3.10 | 1.71 | 3.86 | 2.18 | 1.25 | 0.29        |
| I am often awake at night because I worry that one of my clients will recidivate          | 1.86 | 1.17 | 2.03 | 1.30 | 2.36 | 1.91 | 0.53 | 0.59        |
| I would like to know more about methodologies of risk management                          | 4.64 | 1.82 | 4.97 | 1.61 | 5.07 | 1.86 | 0.29 | 0.75        |
| I am part of a good functioning intervision group                                         | 4.43 | 2.41 | 4.31 | 2.29 | 3.08 | 2.18 | 1.78 | <b>0.17</b> |
| I think it is very good that the probation works with evidence based interventions        | 5.93 | 1.33 | 6.23 | 1.07 | 6.21 | 0.70 | 0.52 | 0.60        |
| I feel sorry for victims of crime                                                         | 5.67 | 1.23 | 5.44 | 1.58 | 6.38 | 0.96 | 2.38 | <b>0.10</b> |
| I want to contribute to an adequate execution of sanctions                                | 5.92 | 1.56 | 5.47 | 1.48 | 6.29 | 0.73 | 2.40 | <b>0.09</b> |
| I feel sorry for people who do not see a way back to society after a crime                | 6.62 | 0.65 | 5.91 | 1.12 | 5.86 | 1.41 | 2.44 | <b>0.09</b> |
| I prefer to work with mandated clients instead of in a voluntary context                  | 6.25 | 1.06 | 5.14 | 1.66 | 5.14 | 1.46 | 2.65 | <b>0.07</b> |
| I believe that people deserve an honest new chance in society after committing an offense | 6.38 | 0.65 | 6.25 | 0.90 | 6.29 | 0.73 | 0.16 | 0.85        |
| I want to contribute to a decrease of crime and nuisance in society                       | 6.50 | 0.67 | 6.25 | 0.83 | 6.50 | 0.76 | 1.08 | 0.34        |
| I am interested in human behavior                                                         | 6.69 | 0.48 | 6.60 | 0.67 | 6.93 | 0.27 | 1.77 | <b>0.17</b> |
| I like being a part of the judicial system                                                | 6.25 | 0.97 | 5.78 | 1.34 | 5.71 | 0.91 | 0.77 | 0.46        |
| I think it is a challenge to work with people on a better future                          | 6.77 | 0.44 | 6.44 | 0.73 | 6.43 | 0.94 | 1.26 | 0.29        |
| I like to work with people with complex problems                                          | 6.15 | 1.14 | 6.03 | 1.19 | 5.64 | 1.50 | 0.75 | 0.48        |
| Every person counts                                                                       | 6.75 | 0.45 | 6.39 | 0.90 | 6.57 | 0.94 | 1.14 | 0.32        |
| I need to make money with something                                                       | 4.08 | 1.62 | 3.09 | 1.97 | 2.86 | 1.96 | 1.59 | 0.21        |

*Note. Bold values are statistically significant at  $p < 0.20$*

Table 5

*Characteristics of the offender and test statistics of difference between offender-rated Goals-Restrictions pattern subgroups*

| offender-related predictor                            | <b>deteriorating</b> |       | <b>stable</b> |       | <b>improving</b> |       | <b>F(<math>\chi^2</math>)</b> | <b>Sig.</b> |
|-------------------------------------------------------|----------------------|-------|---------------|-------|------------------|-------|-------------------------------|-------------|
|                                                       | M(%)                 | SD    | M(%)          | SD    | M(%)             | SD    |                               |             |
| Age                                                   | 32.04                | 12.66 | 34.58         | 12.22 | 37.81            | 13.51 | 1.05                          | 0.35        |
| Previous supervision, yes                             | 0.25                 | 0.44  | 0.30          | 0.46  | 0.13             | 0.34  | 1.13                          | 0.33        |
| Addiction                                             | 11.00                | 5.95  | 8.43          | 5.25  | 8.21             | 4.14  | 1.66                          | <b>0.19</b> |
| I think this client is mentally impaired              | 2.17                 | 1.62  | 2.86          | 2.06  | 3.27             | 2.37  | 1.30                          | 0.28        |
| I think this clients conscious development was normal | 4.50                 | 1.85  | 4.32          | 1.85  | 4.00             | 1.77  | 0.32                          | 0.73        |
| Gender, male                                          | 83.3%                |       | 87.4%         |       | 87.5%            |       | 0.31                          | 0.86        |
| Living situation                                      |                      |       |               |       |                  |       | 7.32                          | 0.50        |
| - partner                                             | 4.2%                 |       | 9.9%          |       | 6.3%             |       |                               |             |
| - partner and children                                | 16.7%                |       | 17.9%         |       | 6.3%             |       |                               |             |
| - single parent                                       | 0.0%                 |       | 5.3%          |       | 6.3%             |       |                               |             |
| - single                                              | 54.2%                |       | 31.8%         |       | 43.8%            |       |                               |             |
| - other                                               | 25.0%                |       | 35.1%         |       | 37.5%            |       |                               |             |
| Active employment                                     |                      |       |               |       |                  |       | 3.04                          | 0.55        |
| - no job                                              | 54.2%                |       | 53.6%         |       | 75.0%            |       |                               |             |
| - paid job                                            | 41.7%                |       | 41.1%         |       | 25.0%            |       |                               |             |
| - volunteer work                                      | 4.2%                 |       | 5.3%          |       | 0.0%             |       |                               |             |
| Age at first conviction                               | 17.65                | 3.66  | 22.04         | 10.21 | 24.00            | 6.65  | 1.90                          | <b>0.15</b> |
| RISc- Delict History + Current offense                | 6.47                 | 3.08  | 5.33          | 3.68  | 5.25             | 4.11  | 0.83                          | 0.44        |
| RISc- Accomodation                                    | 1.21                 | 1.84  | 1.36          | 1.86  | 1.17             | 1.80  | 0.10                          | 0.90        |
| RISc- Education and employment                        | 4.11                 | 3.41  | 4.56          | 3.48  | 5.42             | 3.55  | 0.53                          | 0.59        |
| RISc- Income and financial management                 | 2.32                 | 1.73  | 2.38          | 2.19  | 2.33             | 1.30  | 0.01                          | 0.99        |
| RISc- Relationship partner, relatives, family         | 3.32                 | 2.31  | 3.38          | 2.48  | 3.92             | 2.07  | 0.29                          | 0.75        |
| RISc- Relationships friends                           | 2.37                 | 1.57  | 1.82          | 1.95  | 2.08             | 1.88  | 0.75                          | 0.47        |
| RISc- Drug abuse                                      | 3.42                 | 3.53  | 2.30          | 3.20  | 3.08             | 3.12  | 1.19                          | 0.31        |
| RISc- Alcohol abuse                                   | 2.11                 | 2.75  | 2.00          | 2.81  | 1.92             | 2.84  | 0.02                          | 0.98        |
| RISc- Emotional well-being                            | 3.84                 | 2.79  | 3.28          | 2.47  | 4.58             | 2.43  | 1.75                          | <b>0.18</b> |
| RISc- Thinking and behavior                           | 7.05                 | 3.05  | 6.38          | 3.31  | 7.67             | 3.77  | 1.06                          | 0.35        |
| RISc- Attitudes                                       | 2.26                 | 1.59  | 2.69          | 2.35  | 3.25             | 2.63  | 0.68                          | 0.51        |
| internal motivation                                   | 4.92                 | 2.00  | 5.32          | 2.04  | 3.88             | 2.58  | 3.63                          | <b>0.03</b> |
| Internal regulation                                   | 4.54                 | 1.47  | 5.14          | 1.74  | 3.59             | 2.12  | 6.37                          | <b>0.00</b> |
| External regulation                                   | 5.91                 | 1.38  | 5.69          | 1.45  | 5.66             | 1.39  | 0.26                          | 0.78        |
| Amotivation                                           | 3.02                 | 1.18  | 2.91          | 1.67  | 3.75             | 1.74  | 1.94                          | <b>0.15</b> |
| I think I easily get involved again in an offense     | 2.08                 | 1.61  | 1.79          | 1.58  | 1.81             | 1.72  | 0.36                          | 0.70        |

|                                                         |      |      |      |      |      |      |      |             |
|---------------------------------------------------------|------|------|------|------|------|------|------|-------------|
| I wonder if this supervision was necessary to me.       | 5.38 | 2.02 | 4.18 | 2.44 | 6.06 | 1.61 | 6.68 | <b>0.00</b> |
| I think I was unlucky that I got involved in this crime | 4.91 | 2.33 | 4.35 | 2.55 | 4.69 | 2.63 | 0.58 | 0.56        |
| I only need some practical support from the probation   | 4.59 | 2.44 | 3.82 | 2.39 | 4.33 | 2.35 | 1.19 | 0.31        |
| I can change my behavior as well without probation      | 5.33 | 1.99 | 4.65 | 2.42 | 5.60 | 2.13 | 1.80 | <b>0.17</b> |
| I know exactly where there are the risks to me.         | 6.33 | 1.52 | 6.43 | 1.09 | 6.67 | 0.62 | 0.42 | 0.66        |
| It would be surprised when I finish this supervision    | 1.75 | 1.78 | 1.51 | 1.39 | 1.81 | 2.04 | 0.51 | 0.60        |
| I think I'm definitely able to change my behavior       | 6.50 | 1.29 | 6.49 | 1.25 | 6.07 | 1.79 | 0.73 | 0.49        |

---

*Note. Bold values are statistically significant at  $p < 0.20$*

Table 6

*Characteristics of the PO and test statistics of difference between offender-rated Goals-Restrictions pattern subgroups*

| PO-related predictors                                                     | deteriorating |       | stable |       | improving |       | F( $\chi^2$ ) | Sig.        |
|---------------------------------------------------------------------------|---------------|-------|--------|-------|-----------|-------|---------------|-------------|
|                                                                           | M(%)          | SD    | M(%)   | SD    | M(%)      | SD    |               |             |
| Gender, male                                                              | 15.0%         |       | 35.5%  |       | 53.3%     |       | 5.77          | 0.06        |
| Age                                                                       | 2.45          | 1.32  | 2.27   | 1.11  | 2.47      | 1.46  | 0.37          | 0.69        |
| Work experience probation                                                 | 8.59          | 9.24  | 6.20   | 6.57  | 8.15      | 8.11  | 1.37          | 0.26        |
| General work experience                                                   | 17.05         | 12.26 | 15.55  | 11.08 | 18.17     | 11.46 | 0.47          | 0.63        |
| Change of PO                                                              | 0.32          | 0.95  | 0.28   | 0.70  | 0.13      | 0.34  | 0.39          | 0.68        |
| Until now, I have been too compliant with this client                     | 3.40          | 1.73  | 3.54   | 1.90  | 3.33      | 2.02  | 0.12          | 0.89        |
| This client shows inappropriate behavior                                  | 1.15          | 0.49  | 1.46   | 1.12  | 1.71      | 1.27  | 1.20          | 0.30        |
| This client says he / she cooperates, but I do not notice it              | 1.70          | 0.57  | 2.10   | 1.34  | 2.00      | 1.36  | 0.88          | 0.42        |
| I am afraid of this client                                                | 1.00          | 0.00  | 1.14   | 0.48  | 1.13      | 0.35  | 0.91          | 0.41        |
| Working with this client gives me energy                                  | 4.95          | 1.39  | 4.98   | 1.38  | 4.67      | 1.18  | 0.35          | 0.71        |
| I feel I can mean something for this client                               | 5.15          | 1.31  | 5.31   | 1.18  | 4.67      | 1.29  | 1.99          | <b>0.14</b> |
| I am more strict with this client than I usually am                       | 1.85          | 0.93  | 2.18   | 1.42  | 2.27      | 1.79  | 0.54          | 0.58        |
| If this client does not show up, I feel a bit relieved                    | 1.00          | 0.00  | 1.24   | 0.61  | 1.29      | 0.83  | 1.52          | 0.22        |
| If I had the choice, I would hand this client over to a colleague         | 1.10          | 0.31  | 1.30   | 0.63  | 1.20      | 0.77  | 1.00          | 0.37        |
| I wonder if this client can keep up with the supervision conditions       | 2.55          | 1.19  | 2.89   | 1.79  | 3.33      | 1.76  | 0.88          | 0.42        |
| This client just had bad luck getting involved in this offense            | 1.95          | 1.15  | 1.92   | 1.32  | 1.60      | 0.83  | 0.45          | 0.64        |
| This client only needs some practical support from the probation          | 2.80          | 1.36  | 3.07   | 1.79  | 2.73      | 1.75  | 0.42          | 0.66        |
| This client is definitely capable of changing his / her behavior          | 5.15          | 1.14  | 5.27   | 1.31  | 4.47      | 1.06  | 2.67          | <b>0.07</b> |
| This client wonders if he / she is capable of changing his / her behavior | 3.10          | 1.25  | 3.52   | 1.53  | 4.33      | 1.68  | 2.93          | <b>0.06</b> |
| I think this client will easily get involved in a crime again             | 3.35          | 1.23  | 3.70   | 1.77  | 4.87      | 1.06  | 4.02          | <b>0.02</b> |
| To be honest, I would be surprised if this client                         | 1.85          | 1.09  | 2.00   | 1.32  | 2.80      | 1.15  | 2.92          | <b>0.06</b> |

|                                                                                                                    |      |      |      |      |      |      |      |             |
|--------------------------------------------------------------------------------------------------------------------|------|------|------|------|------|------|------|-------------|
| successfully finishes the supervision                                                                              |      |      |      |      |      |      |      |             |
| With this client, supervision would not have been necessary                                                        | 2.60 | 1.67 | 2.31 | 1.56 | 2.20 | 1.21 | 0.37 | 0.69        |
| My client believes he / she does not need the probation to change his / her behavior                               | 4.75 | 1.77 | 4.15 | 1.69 | 4.60 | 1.18 | 1.45 | 0.24        |
| My client knows exactly what his / her risks are                                                                   | 5.00 | 1.21 | 4.46 | 1.56 | 4.27 | 1.16 | 1.35 | 0.26        |
| I know exactly which behavior of my client increases the risk                                                      | 4.90 | 0.97 | 5.08 | 1.45 | 5.27 | 1.28 | 0.30 | 0.74        |
| I think this client is highly motivated to cooperate with the supervision                                          | 5.20 | 1.11 | 5.14 | 1.50 | 4.53 | 1.73 | 1.19 | 0.31        |
| This client only cooperates because the supervision was imposed by court                                           | 4.11 | 1.56 | 3.88 | 1.94 | 4.60 | 1.96 | 1.04 | 0.36        |
| I think this client can be motivated to successfully finish the supervision                                        | 6.20 | 0.83 | 6.04 | 1.06 | 5.67 | 1.18 | 1.18 | 0.31        |
| I think this client will already recidivate during supervision                                                     | 3.00 | 1.38 | 2.96 | 1.58 | 3.73 | 1.16 | 1.72 | <b>0.18</b> |
| I estimate that during a supervision interview with this client I spend ... % of the time on monitoring activities | 2.00 | 1.21 | 2.03 | 0.87 | 2.13 | 0.92 | 0.10 | 0.90        |
| I find this client more difficult than most of my other clients                                                    | 1.80 | 1.20 | 2.09 | 1.40 | 1.86 | 1.17 | 0.52 | 0.60        |
| I feel more than competent to carry out the supervision of him/her properly.                                       | 5.75 | 1.80 | 6.24 | 0.83 | 6.07 | 1.62 | 1.91 | <b>0.15</b> |
| During my career as a probation officer, I have had to deal with violence by a client                              | 3.55 | 2.39 | 3.39 | 2.25 | 2.93 | 2.02 | 0.35 | 0.70        |
| During my career as probation officer, I have had to deal with inappropriate behavior of a client                  | 4.65 | 2.21 | 4.92 | 2.20 | 6.00 | 1.36 | 1.87 | <b>0.16</b> |
| I love to go to my work                                                                                            | 6.50 | 0.76 | 6.27 | 0.98 | 6.14 | 1.23 | 0.65 | 0.52        |
| I believe that as a probation officer, I can mean a lot to my clients                                              | 5.55 | 1.39 | 5.87 | 0.85 | 6.13 | 0.74 | 1.80 | <b>0.17</b> |
| I feel safe with my colleagues from my unit                                                                        | 6.55 | 0.69 | 6.15 | 1.22 | 6.53 | 0.64 | 1.64 | <b>0.20</b> |
| I feel I get enough support from the organisation in case of a problem                                             | 6.00 | 1.30 | 5.96 | 1.16 | 6.20 | 1.15 | 0.28 | 0.76        |

|                                                                                           |      |      |      |      |      |      |      |             |
|-------------------------------------------------------------------------------------------|------|------|------|------|------|------|------|-------------|
| In my private life, I am proud to tell I work as a probation officer                      | 5.95 | 1.28 | 5.70 | 1.48 | 5.27 | 1.79 | 0.92 | 0.40        |
| I do not like my work so much                                                             | 1.80 | 1.40 | 1.91 | 1.23 | 1.93 | 1.22 | 0.08 | 0.93        |
| As a probation officer, I feel respected by colleagues from other organisations           | 6.15 | 0.81 | 6.03 | 0.94 | 6.13 | 0.74 | 0.22 | 0.80        |
| As a probation officer, I can influence other organisations (e.g., housing, debts, care)  | 5.00 | 1.38 | 4.80 | 1.56 | 5.00 | 1.07 | 0.24 | 0.79        |
| I feel the responsibility of being a probation officer as heavy                           | 4.35 | 1.69 | 4.31 | 1.75 | 4.13 | 2.17 | 0.07 | 0.93        |
| I often think about the possibility of an incident with one of my clients                 | 3.00 | 1.52 | 3.03 | 1.70 | 4.27 | 2.19 | 3.54 | <b>0.03</b> |
| I am often awake at night because I worry that one of my clients will recidivate          | 1.65 | 0.93 | 2.11 | 1.40 | 2.13 | 1.46 | 1.03 | 0.36        |
| I would like to know more about methodologies of risk management                          | 4.80 | 1.54 | 5.01 | 1.62 | 4.93 | 1.86 | 0.15 | 0.86        |
| I am part of a good functioning intervention group                                        | 3.84 | 2.61 | 4.34 | 2.23 | 3.57 | 2.47 | 0.98 | 0.38        |
| I think it is very good that the probation works with evidence based interventions        | 5.95 | 1.54 | 6.26 | 1.01 | 6.27 | 0.80 | 0.76 | 0.47        |
| I feel sorry for victims of crime                                                         | 4.84 | 1.86 | 5.60 | 1.47 | 6.00 | 1.13 | 2.89 | <b>0.06</b> |
| I want to contribute to an adequate execution of sanctions                                | 5.44 | 1.79 | 5.52 | 1.47 | 5.93 | 0.96 | 0.58 | 0.56        |
| I feel sorry for people who do not see a way back to society after a crime                | 5.89 | 1.41 | 6.02 | 1.06 | 5.40 | 1.24 | 2.12 | <b>0.12</b> |
| I prefer to work with mandated clients instead of in a voluntary context                  | 5.53 | 1.65 | 5.20 | 1.69 | 4.73 | 1.39 | 0.96 | 0.38        |
| I believe that people deserve an honest new chance in society after committing an offense | 6.21 | 0.98 | 6.27 | 0.88 | 6.33 | 0.62 | 0.08 | 0.92        |
| I want to contribute to a decrease of crime and nuisance in society                       | 6.42 | 0.69 | 6.27 | 0.81 | 6.33 | 0.72 | 0.34 | 0.71        |
| I am interested in human behavior                                                         | 6.37 | 0.90 | 6.67 | 0.59 | 6.67 | 0.62 | 1.95 | <b>0.15</b> |

|                                                                  |      |      |      |      |      |      |      |      |
|------------------------------------------------------------------|------|------|------|------|------|------|------|------|
| I like being a part of the judicial system                       | 6.05 | 1.13 | 5.85 | 1.28 | 5.40 | 0.99 | 1.22 | 0.30 |
| I think it is a challenge to work with people on a better future | 6.37 | 0.60 | 6.47 | 0.75 | 6.53 | 0.83 | 0.22 | 0.80 |
| I like to work with people with complex problems                 | 6.05 | 1.08 | 6.02 | 1.23 | 5.80 | 1.42 | 0.24 | 0.79 |
| Every person counts                                              | 6.26 | 1.05 | 6.45 | 0.87 | 6.53 | 0.74 | 0.47 | 0.63 |
| I need to make money with something                              | 2.56 | 1.89 | 3.19 | 1.98 | 3.40 | 1.76 | 0.98 | 0.38 |

---

*Note. Bold values are statistically significant at  $p < 0.20$*



Table 7

*Characteristics of the offender and test statistics of difference between offender-rated Teactance pattern subgroups*

| offender-related predictor                            | deteriorating |       | stable |       | improving |       | F( $\chi^2$ ) | sign        |
|-------------------------------------------------------|---------------|-------|--------|-------|-----------|-------|---------------|-------------|
|                                                       | M(%)          | SD    | M(%)   | SD    | M(%)      | SD    |               |             |
| Age                                                   | 34.36         | 12.12 | 34.99  | 12.65 | 39.77     | 15.27 | 0.87          | 0.42        |
| Previous supervision, yes                             | 0.27          | 0.47  | 0.27   | 0.45  | 0.31      | 0.48  | 0.04          | 0.96        |
| Addiction                                             | 12.43         | 5.29  | 8.30   | 5.26  | 10.00     | 3.59  | 2.42          | <b>0.09</b> |
| I think this client is mentally impaired              | 4.00          | 2.14  | 2.66   | 1.98  | 3.11      | 2.52  | 1.83          | <b>0.16</b> |
| I think this clients conscious development was normal | 3.38          | 2.00  | 4.41   | 1.80  | 4.20      | 2.35  | 1.24          | 0.29        |
| Gender, male                                          | 100.0         |       | 85.9%  |       | 100.0     |       | 3.87          | <b>0.14</b> |
|                                                       | %             |       |        |       | %         |       |               |             |
| Living situation                                      |               |       |        |       |           |       | 4.23          | 0.81        |
| - partner                                             | 9.1%          |       | 10.2%  |       | 0.0%      |       |               |             |
| - partner and children                                | 18.2%         |       | 16.9%  |       | 23.1%     |       |               |             |
| - single parent                                       | 9.1%          |       | 5.1%   |       | 0.0%      |       |               |             |
| - single                                              | 36.4%         |       | 33.9%  |       | 53.8%     |       |               |             |
| - other                                               | 27.3%         |       | 33.9%  |       | 23.1%     |       |               |             |
| Active employment                                     |               |       |        |       |           |       | 6.88          | <b>0.14</b> |
| - no job                                              | 81.8%         |       | 53.1%  |       | 69.2%     |       |               |             |
| - paid job                                            | 9.1%          |       | 42.9%  |       | 23.1%     |       |               |             |
| - volunteer work                                      | 9.1%          |       | 4.0%   |       | 7.7%      |       |               |             |
| Age at first conviction                               | 24.83         | 14.41 | 21.78  | 9.81  | 21.91     | 7.88  | 0.27          | 0.76        |
| RISc- Delict History + Current offense                | 7.29          | 4.82  | 5.22   | 3.65  | 7.00      | 3.07  | 2.14          | <b>0.12</b> |
| RISc- Accomodation                                    | 2.29          | 3.09  | 1.21   | 1.73  | 1.91      | 1.92  | 1.84          | <b>0.16</b> |
| RISc- Education and employment                        | 4.14          | 2.97  | 4.53   | 3.53  | 4.91      | 3.24  | 0.11          | 0.90        |
| RISc- Income and financial management                 | 3.14          | 1.86  | 2.23   | 2.03  | 3.45      | 2.16  | 2.40          | <b>0.09</b> |
| RISc- Relationship partner, relatives, family         | 3.71          | 2.87  | 3.40   | 2.41  | 3.64      | 2.66  | 0.10          | 0.91        |
| RISc- Relationships friends                           | 1.43          | 2.44  | 1.80   | 1.86  | 2.64      | 2.01  | 1.17          | 0.31        |
| RISc- Drug abuse                                      | 3.14          | 2.34  | 2.47   | 3.32  | 2.64      | 2.58  | 0.16          | 0.86        |
| RISc- Alcohol abuse                                   | 3.71          | 3.86  | 1.84   | 2.66  | 3.09      | 3.21  | 2.47          | <b>0.09</b> |
| RISc- Emotional well-being                            | 4.00          | 3.00  | 3.42   | 2.52  | 3.00      | 2.05  | 0.34          | 0.71        |
| RISc- Thinking and behavior                           | 8.57          | 4.04  | 6.44   | 3.40  | 6.55      | 2.02  | 1.34          | 0.26        |
| RISc- Attitudes                                       | 4.14          | 3.13  | 2.56   | 2.27  | 3.36      | 2.34  | 2.07          | <b>0.13</b> |
| Internal motivation                                   | 5.64          | 1.96  | 5.08   | 2.12  | 5.23      | 2.52  | 0.37          | 0.69        |
| Internal regulation                                   | 4.93          | 2.23  | 4.89   | 1.79  | 5.37      | 1.56  | 0.43          | 0.65        |
| External regulation                                   | 5.66          | 1.45  | 5.74   | 1.41  | 5.44      | 1.77  | 0.28          | 0.76        |
| Amotivation                                           | 4.18          | 2.06  | 2.95   | 1.60  | 2.77      | 1.32  | 3.18          | <b>0.04</b> |
| I think I easily get involved again in an offense     | 2.73          | 2.15  | 1.74   | 1.51  | 1.85      | 1.77  | 2.04          | <b>0.13</b> |
| I wonder if this supervision was necessary to me.     | 4.00          | 2.72  | 4.60   | 2.37  | 4.77      | 2.52  | 0.37          | 0.69        |

|                                                         |      |      |      |      |      |      |      |             |
|---------------------------------------------------------|------|------|------|------|------|------|------|-------------|
| I think I was unlucky that I got involved in this crime | 5.09 | 2.43 | 4.43 | 2.51 | 4.62 | 2.72 | 0.38 | 0.69        |
| I only need some practical support from the probation   | 5.70 | 2.00 | 3.76 | 2.36 | 5.23 | 2.28 | 5.31 | <b>0.01</b> |
| I can change my behavior as well without probation      | 5.50 | 2.32 | 4.85 | 2.31 | 3.92 | 2.75 | 1.40 | 0.25        |
| I know exactly where there are the risks to me.         | 6.82 | 0.40 | 6.42 | 1.14 | 6.46 | 1.05 | 0.67 | 0.51        |
| It would be surprised when I finish this supervision    | 2.64 | 2.38 | 1.52 | 1.46 | 1.31 | 0.63 | 3.14 | <b>0.05</b> |
| I think I'm definitely able to change my behavior       | 6.73 | 0.47 | 6.41 | 1.36 | 6.69 | 0.75 | 0.54 | 0.58        |

---

*Note. Bold values are statistically significant at  $p < 0.20$*

Table 8

*Characteristics of the PO and test statistics of difference between offender-rated Reactance pattern subgroups*

| PO-related predictor                                                      | deteriorating |       | stable |       | improving |      | F( $\chi^2$ ) | Sig.        |
|---------------------------------------------------------------------------|---------------|-------|--------|-------|-----------|------|---------------|-------------|
|                                                                           | M(%)          | SD    | M(%)   | SD    | M(%)      | SD   |               |             |
| Gender male                                                               | 33.3%         |       | 35.0%  |       | 27.3%     |      | 0.28          | 0.87        |
| Age                                                                       | 3.11          | 1.17  | 2.33   | 1.14  | 1.91      | 1.22 | 2.80          | <b>0.06</b> |
| Work experience probation                                                 | 7.56          | 4.33  | 6.73   | 7.36  | 4.50      | 3.15 | 0.59          | 0.56        |
| General work experience                                                   | 22.81         | 15.90 | 15.87  | 10.85 | 13.41     | 9.72 | 1.84          | <b>0.16</b> |
| Change of PO                                                              | 0.27          | 0.65  | 0.27   | 0.73  | 0.31      | 0.63 | 0.02          | 0.98        |
| Until now, I have been too compliant with this client                     | 3.67          | 1.94  | 3.56   | 1.89  | 3.18      | 1.94 | 0.22          | 0.80        |
| This client shows inappropriate behavior                                  | 1.33          | 0.71  | 1.42   | 1.05  | 1.80      | 1.40 | 0.66          | 0.52        |
| This client says he / she cooperates, but I do not notice it              | 2.22          | 1.56  | 2.03   | 1.25  | 2.18      | 1.40 | 0.17          | 0.85        |
| I am afraid of this client                                                | 1.11          | 0.33  | 1.10   | 0.36  | 1.60      | 1.07 | 6.54          | <b>0.00</b> |
| Working with this client gives me energy                                  | 4.56          | 1.94  | 4.96   | 1.36  | 4.55      | 1.37 | 0.78          | 0.46        |
| I feel I can mean something for this client                               | 4.78          | 1.79  | 5.28   | 1.19  | 4.73      | 1.27 | 1.67          | <b>0.19</b> |
| I am more strict with this client than I usually am                       | 2.00          | 1.12  | 2.13   | 1.41  | 2.55      | 1.51 | 0.51          | 0.60        |
| If this client does not show up, I feel a bit relieved                    | 1.67          | 1.32  | 1.19   | 0.54  | 1.27      | 0.47 | 2.72          | <b>0.07</b> |
| If I had the choice, I would hand this client over to a colleague         | 1.56          | 1.33  | 1.25   | 0.57  | 1.27      | 0.47 | 1.01          | 0.37        |
| I wonder if this client can keep up with the supervision conditions       | 4.11          | 1.27  | 2.80   | 1.75  | 3.00      | 1.48 | 2.51          | <b>0.08</b> |
| This client just had bad luck getting involved in this offense            | 1.22          | 0.44  | 2.01   | 1.36  | 1.73      | 0.79 | 1.73          | <b>0.18</b> |
| This client only needs some practical support from the probation          | 2.44          | 1.94  | 3.07   | 1.75  | 3.09      | 1.97 | 0.54          | 0.58        |
| This client is definitely capable of changing his / her behavior          | 4.78          | 1.30  | 5.20   | 1.32  | 4.70      | 1.49 | 1.04          | 0.36        |
| This client wonders if he / she is capable of changing his / her behavior | 4.33          | 1.50  | 3.52   | 1.49  | 3.91      | 1.70 | 1.54          | 0.22        |
| I think this client will easily get involved in a crime again             | 4.89          | 1.90  | 3.61   | 1.65  | 4.27      | 2.00 | 3.12          | <b>0.05</b> |
| To be honest, I would be surprised if this client                         | 3.33          | 2.29  | 1.98   | 1.25  | 2.27      | 1.01 | 4.82          | <b>0.01</b> |

|                                                                                                                    |      |      |      |      |      |      |      |             |
|--------------------------------------------------------------------------------------------------------------------|------|------|------|------|------|------|------|-------------|
| successfully finishes the supervision                                                                              |      |      |      |      |      |      |      |             |
| With this client, supervision would not have been necessary                                                        | 1.67 | 1.00 | 2.41 | 1.58 | 2.27 | 1.56 | 0.99 | 0.37        |
| My client believes he / she does not need the probation to change his / her behavior                               | 2.56 | 1.94 | 4.42 | 1.63 | 4.09 | 1.81 | 5.54 | <b>0.01</b> |
| My client knows exactly what his / her risks are                                                                   | 5.00 | 1.58 | 4.44 | 1.48 | 4.64 | 1.50 | 0.67 | 0.51        |
| I know exactly which behavior of my client increases the risk                                                      | 5.56 | 1.13 | 5.01 | 1.38 | 5.73 | 1.10 | 2.01 | <b>0.14</b> |
| I think this client is highly motivated to cooperate with the supervision                                          | 3.89 | 1.54 | 5.11 | 1.48 | 5.36 | 1.21 | 3.19 | <b>0.04</b> |
| This client only cooperates because the supervision was imposed by court                                           | 4.13 | 2.47 | 4.04 | 1.87 | 4.18 | 2.04 | 0.04 | 0.97        |
| I think this client can be motivated to successfully finish the supervision                                        | 5.44 | 1.59 | 6.04 | 1.04 | 5.90 | 0.99 | 1.38 | 0.25        |
| I think this client will already recidivate during supervision                                                     | 4.22 | 1.30 | 2.89 | 1.49 | 3.55 | 1.97 | 4.02 | <b>0.02</b> |
| I estimate that during a supervision interview with this client I spend ... % of the time on monitoring activities | 2.56 | 1.13 | 1.98 | 0.87 | 2.36 | 1.29 | 2.54 | <b>0.08</b> |
| I find this client more difficult than most of my other clients                                                    | 2.78 | 1.92 | 1.98 | 1.30 | 1.91 | 1.38 | 1.55 | 0.22        |
| I feel more than competent to carry out the supervision of him/her properly.                                       | 5.78 | 1.92 | 6.17 | 1.02 | 6.45 | 0.52 | 1.02 | 0.36        |
| During my career as a probation officer, I have had to deal with violence by a client                              | 4.11 | 2.80 | 3.29 | 2.19 | 4.11 | 2.20 | 1.09 | 0.34        |
| During my career as probation officer, I have had to deal with inappropriate behavior of a client                  | 4.00 | 2.35 | 4.94 | 2.17 | 5.73 | 1.79 | 1.58 | 0.21        |
| I love to go to my work                                                                                            | 5.89 | 1.96 | 6.28 | 0.92 | 6.36 | 0.81 | 0.72 | 0.49        |
| I believe that as a probation officer, I can mean a lot to my clients                                              | 5.78 | 0.97 | 5.84 | 0.92 | 6.09 | 0.83 | 0.41 | 0.66        |

|                                                                                           |      |      |      |      |      |      |      |             |
|-------------------------------------------------------------------------------------------|------|------|------|------|------|------|------|-------------|
| I feel safe with my colleagues from my unit                                               | 5.67 | 1.87 | 6.28 | 1.08 | 6.18 | 0.98 | 1.32 | 0.27        |
| I feel I get enough support from the organisation in case of a problem                    | 6.00 | 1.22 | 6.01 | 1.14 | 5.82 | 1.33 | 0.14 | 0.87        |
| In my private life, I am proud to tell I work as a probation officer                      | 5.33 | 1.73 | 5.69 | 1.50 | 5.82 | 1.17 | 0.30 | 0.74        |
| I do not like my work so much                                                             | 2.11 | 1.54 | 1.91 | 1.23 | 2.00 | 1.18 | 0.14 | 0.87        |
| As a probation officer, I feel respected by colleagues from other organisations           | 6.44 | 0.73 | 6.03 | 0.89 | 6.20 | 1.14 | 1.03 | 0.36        |
| As a probation officer, I can influence other organisations (e.g., housing, debts, care)  | 5.00 | 1.94 | 4.81 | 1.48 | 4.82 | 1.54 | 0.07 | 0.93        |
| I feel the responsibility of being a probation officer as heavy                           | 3.89 | 1.90 | 4.40 | 1.77 | 3.18 | 1.60 | 2.70 | <b>0.07</b> |
| I often think about the possibility of an incident with one of my clients                 | 3.11 | 1.90 | 3.14 | 1.74 | 3.50 | 1.96 | 0.21 | 0.82        |
| I am often awake at night because I worry that one of my clients will recidivate          | 1.33 | 0.71 | 2.09 | 1.37 | 1.82 | 1.17 | 1.53 | 0.22        |
| I would like to know more about methodologies of risk management                          | 5.00 | 1.50 | 4.94 | 1.66 | 5.11 | 1.54 | 0.05 | 0.95        |
| I am part of a good functioning intervention group                                        | 4.38 | 2.50 | 4.10 | 2.30 | 5.73 | 1.79 | 2.63 | <b>0.08</b> |
| I think it is very good that the probation works with evidence based interventions        | 6.33 | 0.71 | 6.20 | 1.05 | 6.27 | 1.49 | 0.09 | 0.91        |
| I feel sorry for victims of crime                                                         | 5.56 | 1.33 | 5.56 | 1.51 | 4.90 | 2.08 | 0.86 | 0.43        |
| I want to contribute to an adequate execution of sanctions                                | 5.89 | 1.27 | 5.57 | 1.46 | 5.27 | 1.62 | 0.44 | 0.64        |
| I feel sorry for people who do not see a way back to society after a crime                | 6.00 | 1.00 | 5.96 | 1.15 | 5.91 | 1.04 | 0.02 | 0.98        |
| I prefer to work with mandated clients instead of in a voluntary context                  | 5.11 | 1.54 | 5.19 | 1.63 | 5.55 | 1.86 | 0.25 | 0.78        |
| I believe that people deserve an honest new chance in society after committing an offense | 6.56 | 0.53 | 6.25 | 0.88 | 6.18 | 0.98 | 0.58 | 0.56        |

|                                                                     |      |      |      |      |      |      |      |      |
|---------------------------------------------------------------------|------|------|------|------|------|------|------|------|
| I want to contribute to a decrease of crime and nuisance in society | 5.89 | 0.78 | 6.31 | 0.78 | 6.18 | 1.25 | 1.22 | 0.30 |
| I am interested in human behavior                                   | 6.67 | 0.50 | 6.61 | 0.66 | 6.91 | 0.30 | 1.13 | 0.33 |
| I like being a part of the judicial system                          | 5.56 | 0.88 | 5.83 | 1.32 | 5.73 | 1.27 | 0.21 | 0.81 |
| I think it is a challenge to work with people on a better future    | 6.44 | 0.73 | 6.45 | 0.75 | 6.60 | 0.52 | 0.20 | 0.82 |
| I like to work with people with complex problems                    | 6.22 | 0.83 | 5.98 | 1.23 | 6.27 | 1.10 | 0.46 | 0.63 |
| Every person counts                                                 | 6.78 | 0.44 | 6.41 | 0.89 | 6.45 | 1.04 | 0.77 | 0.47 |
| I need to make money with something                                 | 2.33 | 1.50 | 3.18 | 1.96 | 3.20 | 2.25 | 0.81 | 0.45 |

---

*Note. Bold values are statistically significant at  $p < 0.20$*
